# Supplementary material for: β-Conglutins’ Unique Mobile Arm Is a Key Structural Domain Involved in Molecular Nutraceutical Properties of Narrow-Leafed Lupin (Lupinus angustifolius L.)
Source: MDPI journal article supplement (doi:10.3390/ijms24087676), 2023-04-21
Supplement: s1 [file s1]

A

F5B8W4\_β6 MIKMRVRFPTLVLLLGIVFLMAVSIGIAYGEKNVIKNHERPQEREQEERDPRQQPRPHHQEEQEREHRREEERDREPSRGRSESEESREEEREQRREPRREREQEQQPQHGRREEEEE--  
F5B8W2\_β4 MIKMRVRFPTLVLLLGIVFLMAVSIGIAYGEKNVIKNHERPQEREQEERDPRQQPRPHHQEEQEREHRREEERDREPSRGRSESEESREEEREQRREPRREREQEQQPQHGRREEEEE--  
F5B8W1\_β3 MAKMRVRFPTLVLLLGIVFLMAVSIGIAYGEKNVLKNHERPQEREQEERDPRQQPRPHHQEEQEREHRRE-----SEESQEEEREQRREPRREREQEQQPQHGRREEEEE--  
F5B8W0\_β2 MANMRVKFPTLVLLLGIVFLMAVSIGIAYGEKNAIKNHERPQEREQEERDPRQQPRPHHQEEQEREHGREERNREPSRGRSESEESREEEREQRREPSRGREQEQQPQHGRREEEEE--  
F5B8W5\_β5 MAKMRVRFPMVLVLLLGIVFLMAVSIGIAYGEKDVKNPERPEERQEERDPRQPPRSRQQEEQEREHRREKERDREPSRGRSESKQSQEEERERRKEHDREREQEQQPQYGRRHEEEEEKG  
F5B8W3\_β7 MARMRVRFPTLVLLLGILFLMAVSIGIAYGEKDVKNHERPGEREHEERDPRQQPRPRKQEEQEREHRREEEHDRDPSRGRSESEERQEEERERRREPCREREQEQQPQHGRREEEEE--  
F5B8V9\_β1 MAKMRVRLPMLLILLGVVFLLAASIGIAYGEKDFTKNP--PKEREEEEHEPRQQPRPRQQEEQEREHRREEKHDGEPGRGRSQSEESQEEEHERRREHHREREQEQQPRPQRRQEEEEEE  
Consensus \* .\*\*\*:.\* \*:\*\*\*\*:\*\*\*:\*.\*\*\*\*\*: \*\* \* \*\*:.\*:\*\*\* \*\*.:\*\*\*\*\* \*\* \*: :\*\*\*\*:\*\*\*: \* \*\*\*\*\*: \*\*.\*\*\*\*

F5B8W4\_β6 ----WQPRRQRPQSRREEREQEQQSSSSSRQSAYERREQREEREQE-----QEQGSRSDSRRQRNPYYFSSERFQTLYRNRNGQIRVLER  
F5B8W2\_β4 ----WQPRRQRPQSRREEREQEQQSSSSSRQSGYERRE---EREQE-----QEQGSRSDSRRQRNPYYFSSERFQTLYRNRNGQIRVLER  
F5B8W1\_β3 ----WQPRRQRPQSRREEREQEQQSSSSSRQSGYERREQREEREQE-----QEQGSRSDSRRQRNPYYFSSERFQTLYRNRNGQIRVLER  
F5B8W0\_β2 ----WQPRRQRPQSRREEREQEQQSSSSSGRQSGYERREQREEREQQ-----QEQDSRSSESRQRNPYYFSYERFQTLYKNRNGQIRVLER  
F5B8W5\_β5 EEEEEGQARRQRPQRRREEREQEQQSSSESRRQSGDERHRHREKREQREEREQEQQSSSGRQSDYGRRQRHEGREQREEREQEQQSSSESHRLRNPYYFSSERFQTRYKNKNGQIRVLER  
F5B8W3\_β7 --EEEWQPRRLRPQSRKEEREQEQQSSSSSRKQSGYERRQYHERREQRDEKE-----KEQDSRSDSRRQRNPYHFSSERFQTRYRNRNGQIRVLER  
F5B8V9\_β1 EEWQPRRQRPQSRREEREEREQEQQSSSGSQRGSGDERRQHRERRVHREERE-----QEQDSRSDSRRQRNPYHFSSNRFQTIYRNRNGQIRVLER  
Consensus : \* : .:\*\*\*\*\* \* : \*. \*\*\*. .\* :. :\*. \* \*:.\* \*\*\*\*\*:\*\*\* :\*\*\*\* \*:\*:\*\*\*\*\*

F5B8W4\_β6 FDKRTDRLNLQNYRIVEFQSKPNTLILPKHSDADYILVVLNGSATITIVNPDKRQSYNLENGDALRLPAGTTSYILNPDDNQNLRVVKLAIPINNPGNFYDFYPSSSKDQQSYFSGFSR  
F5B8W2\_β4 FDQRTDRLNLQNYRIVEFQSKPNTLILPKHSDADYILVVLNGSATITIVNPDKRQSYNLENGDALRLPAGTTSYILNPDDNQNLRVVKLAIPINNPGNFYDFYPSSSKDQQSYFSGFSR  
F5B8W1\_β3 FDQRTNRLNLQNYRIVEFQSKPNTLILPKHSDADYILVVLNGSATITIVNPDKRQSYNLENGDALRLPAGTTSYILNPDDNQNLRVVKLAIPINNPGNFYDFYPSSSKDQQSYFSGFSK  
F5B8W0\_β2 FDQRTNRLNLQNYRIVEFQSKPNTLILPKHSDADYILVVLNGRATITIVNPDKRQAYNLEHGDALRLPAGTTSYILNPDDNQNLRVVKLAIPINNPGNFYDFYPSSTKDQQSYFNGFSR  
F5B8W5\_β5 FDQRTNRLNLQNYRIVEFQSRPNTLILPKHSDADYILVVLNGRATITIVNPDKRQAYNLEYGDALRLPAGTTSYILNPDDNQDLRVVKLAIPINNPGKFYDFYPSRTKDQQSYFSGFSK  
F5B8W3\_β7 FDQRTNRLNLQNYRIVEFQSNPNTLILPKHSDADYILVVLNGRATITIVNPDKRQAYNLEYGDALRVPAITTSYILNPDDNQNLRVVKLAIPINNPSNFYDFYPSSTKDQQSYFSGFSK  
F5B8V9\_β1 FNQRTNRLNLQNYRIIEFQSKPNTLILPKHSDADFILVVLNGRATITIVNPDKRQVYNLEQGDALRLPAGTTSYILNPDDNQNLRVAKLAIPINNPGKLYDFYPSSTKDQQSYFSGFSK  
Consensus \*:\*\*\*:\*\*\*\*\*:\*\*\*\*.\*\*\*\*\*:\*\*\*\*\* \*\*\*\*\* \*\*\*\*\*:\*\*\*\*\*:\*\*\*.\*\*\*\*\*.:\*\*\*\*\* :\*\*\*\*\*.\*\*\*:

F5B8W4\_β6 NTLEATFNTRYEEIQRILLGNEDEQEDDEQRHGQEESHQDEGVIVRVSKEQVQELRKYAQSSSRKKGKPSKSGPFNLSNKPIYSNKFGNFYEITPNRNPQAQDLDISLTFIEINEGALLL  
F5B8W2\_β4 NTLEATFNTRYEEIQRILLGNEDEQEDDEQRHGQEESHQDEGVIVRVSKEQVQELRKYAQSSSRKKGKPSKSGPFNLSNKPIYSNKFGNFYEITPNRNPQAQDLDISLTFIEINEGALLL  
F5B8W1\_β3 NTLEATFNTRYEEIQSILLGNEDEQEDDEQWHGQEESHQDEGVIVRVSKEQVQELRKYAQSSSRKKGKPYESGPFNLSNKPIYSNKFGNFYEITPDRNPQAQDLDISLTFIEINEGALLL  
F5B8W0\_β2 NTLEATFNTRYEEIQRILLGNEDEQEDDEQSRGQEESHQDQGVIVRVSKEQIQELRKHAQSSSGKGKPSSESGPFNLSDEPIYSNKFGNFYEITPDRNPQAQDLDISLTFIEINEGGLLL  
F5B8W5\_β5 NTLEATFNTHYEEIQRILLGYEDEQEDDEQRREQEESHQDEGVIVRVSKEQIQELRKHAQSSSRKKGKPSSESGPFNLSNEPIYSNKFGNFYEITPDRNPQVQDLDISLTFIEISEGALLL  
F5B8W3\_β7 NTLEATFNTRYEEIQRILLGNEDEQEDDEQRRGQEESYQDEGVIVRVSKEQIQELRKHAQSSSRKKGKPSSESGPFNLSNESIYSNKFGNFYEITPERNPQVQDLDISLTFIEINEGALLL  
F5B8V9\_β1 NTLEATFNTRYEEIERVLLGDDELQENKQRRGQEESHQDEGVIVRVSKEQIQELRKHAQSSSGEGKPSSESGPFNLSNKPIYSNKFGNFYEITPDINPQFQDLNISLTFIEINEGALLL  
Consensus \*\*\*\*\*:\*\*\*\*: :\*\* :: \*\*:.\* : \*\*\*\*:\*\*\*:\*\*\*\*\*:\*\*\*:\*\*\*\*\*:\*\*\* :\*\*\* :\*\*\*\*\*:\*.\*\*\*\*\*:\*\*\* \*\*\*:\*\*\* \* \*\*.\*.\*\*\*

F5B8W4\_β6 PHYNSKAI FVVLVDEGE GNYELVGIRDQQRQQDEQE-----VRRYSARLSEGDIFV IPAGHPISINASSNFRLLGFGINADENQRNFLAGFEDNVIRQLDREVKGLTFPGFAEDVE  
F5B8W2\_β4 PHYNSKAI FVVLVDEGE GNYELVGIRDQQRQQDEQE-----VRRYSARLSEGDIFV IPAGHPISINASSNLRLLLGFGINADENQRNFLAGSEDNVIRQLDTEVKGLTFPGSTEDVE  
F5B8W1\_β3 PHYNSKAI FVVVVDEGE GNYELVGIRDQQRQQDEQE-----VRRYSARLSEGDIFV IPAGHPISINASSNLRLLLGFGINADENQRNFLAGSEDNVIRQLDREVKGLTFPGSAEDVE  
F5B8W0\_β2 PHYNSKAI FVVVVDEGE GNYELVGIRDQERQQDEQE QEE-----VRRYNAKLSEGDIFV IPAGHPISINASSNLRLLLGFGINADENQRNFLAGSEDNVIRQLDKEVKGLTFPGSVEDVE  
F5B8W5\_β5 PHYNSKAI FVIVVDEGE GNYELVGIRNQQRQQDEQEVEE-----VRSYNARLSEGDILV IPAGHPLSINASSNLRLLLGFGINADENQRNFLAGSEDNVIRQLDREVKELTFPGSAEDVE  
F5B8W3\_β7 PHYNSKAI FIVVVDEGE GNYELVGIRDQQRQQDEQE EEEE----EVRYSARLSEGDIFV IPAGYPISVNASSNLRLLLGFGINANENQRNFLAGSEDNVISQLDREVKELTFPGSAQDVE  
F5B8V9\_β1 PHYNSKAI FIVVVDEGE GNYELVGIRDQQRQQDEQE EEEYEQGE EEVRRYSDKLSKGDVFI IPAGHPLSINASSNLRLLLGFGINANENQRNFLAGSEDNVIKQLDREVKELTFPGSIEDVE  
Consensus \*\*\*\*\*:\*\*\*:\*\*\*\*\*:\*\*\*:\*\*\*\*\* \*\* \*. :\*\*\*:\*\*\*:\*\*\*\*:\*\*\*:\*\*\*\*\*:\*\*\*\*\* \*\*\*\*\* \*\*\*\*\* \* \*\* :\*\*\*

F5B8W4\_β6 RLIKNQQQSYFANAQPQQQQQ-REREGRHGRRGHIFSILSTLY-----  
F5B8W2\_β4 RLIKNQQQSYFANAQPQQQQQ-REREGRRGRRGHISILSTLY-----  
F5B8W1\_β3 RLIKNQQQSYFANAQPQQQQQ-REREGRHGRRGHISILSTLY-----  
F5B8W0\_β2 RLIKNQQQSYFANAQPQQQQQ-REKEGRRGRRGLSFPFRSLFTKLLSTIM  
F5B8W5\_β5 RLIRNQQQSYFANAQPQQQQQQREKEGRRGRRGPISILSALY-----  
F5B8W3\_β7 RLIKNQQQSYFANAQPQQKQQ-REKEGRRGRRSLISSILSTLY-----  
F5B8V9\_β1 RLIKNQQQSYFANAQPQQQQQ-REKEGRRGRRGPISILNALY-----  
Consensus \*\*\*:\*\*\*\*\*:\*\*\* \*\*:\*\*\*:\*\*\*. .: . :



|           |                                                                                                                           |
|-----------|---------------------------------------------------------------------------------------------------------------------------|
| F5B8V9_β1 | EQDSRSDSRQRNPYHFSSNRFTQTYRNRNGQIRVLERFNRQRTNRLENLQNYRIIEFQSK PNTLILPKHSDADFILVVLNGRATITIVNPDKRQVYNLEQGDALRLPAGTTSYILNPDDN |
| F5B8W3_β7 | EQDSRSDSRQRNPYHFSSERFQTRYRNRNGQIRVLERFDQRTNRLENLQNYRIVEFQSN PNTLILPKHSDADYILVVLNGRATITIVNPDKRQAYNLEYGDALRVPAGTTSYILNPDDN  |
| F5B8W2_β4 | EQGSRSDSRQRNPYYFSSERFQTLYRNRNGQIRVLERFDQRTDRLENLQNYRIVEFQSK PNTLILPKHSDADYILVVLNGSATITIVNPDKRQSYNLENGDALRLPAGTTSYILNPDDN  |
| F5B8W4_β6 | EQGSRSDSRQRNPYYFSSERFQTLYRNRNGQIRVLERFDKRTDRLENLQNYRIVEFQSK PNTLILPKHSDADYILVVLNGSATITIVNPDKRQSYNLENGDALRLPAGTTSYILNPDDN  |
| F5B8W1_β3 | EQGSRSDSRQRNPYYFSSERFQTLYRNRNGQIRVLERFDQRTNRLENLQNYRIVEFQSK PNTLILPKHSDADYILVVLNGSATITIVNPDKRQSYNLENGDALRLPAGTTSYILNPDDN  |
| F5B8W2_β2 | EQDSRSESRRQRNPYYFSYERFQTLYKNRNGQIRVLERFDQRTNRLENLQNYRIVEFQSK PNTLILPKHSDADYILVVLNGRATITIVNPDKRQAYNLEHGDALRLPAGTTSYILNPDDN |
| F5B8W5_β5 | EQGSSSESHRLRNPYYFSSERFQTRYKNKNGQIRVLERFDQRTNRLENLQNYRIVEFQSR PNTLILPKHSDADYILVVLNGRATITIVNPDKRQAYNLEYGDALRLPAGTTSYILNPDDN |
| Consensus | **.* *:.* *****:**** *:.*:*****:.*:*****:****.*****:***** *****:*****                                                     |

|           |                                                                                                                              |
|-----------|------------------------------------------------------------------------------------------------------------------------------|
| F5B8V9_β1 | QNLRVAKLAIPINNPGKLYDFYPSTTKDQQSYFSGFSKNTLEATFNTRYEEIERVLLGDDELQENЕКQRRGQEQSHQDEGVIVRVSKKQIQELRKHAQSSSGEGKPSES GPFNLRSNKPI    |
| F5B8W3_β7 | QNLRVVKLAIPINNPSNFYDFYPSSTKDQQSYFSGFSKNTLEATFNTRYEEIQRILLGNE DEQEDEEQRRGQE QSYQDEGVIVRVSKEQIQELRKHAQSSSRKGKPPSES GPFNLRSNESI |
| F5B8W2_β4 | QNLRVVKLAIPINNPNGFYDFYPSSSKDQQSYFSGFSRNTLEATFNTRYEEIQRILLGNE DEQEDDEQRHGQE QSHQDEGVIVRVSKEQVQELRKYAQSSSRKGKPKSKSGPFNLRSNKPI  |
| F5B8W4_β6 | QNLRVVKLAIPINNPNGFYDFYPSSSKDQQSYFSGFSRNTLEATFNTRYEEIQRILLGNE DEQEDDEQRHGQE QSHQDEGVIVRVSKEQVQELRKYAQSSSRKGKPKSKSGPFNLRSNKPI  |
| F5B8W1_β3 | QNLRVVKLAIPINNPNGFYDFYPSSSKDQQSYFSGFSKNTLEATFNTRYEEIQSILLGNE DEQEDDEQWHGQE QSHQDEGVIVRVSKEQVQELRKYAQSSSRKGKPYES GPFNLRSNKPI  |
| F5B8W2_β2 | QNLRVVKLAIPINNPNGFYDFYPSSTKDQQSYFNGFSRNTLEATFNTRYEEIQRILLGNE DGQEDEEQSRGQE QSHQDQGIVRVSKEQIQELRKHAQSSSGKGKPPSES GPFNLRSDPEI  |
| F5B8W5_β5 | QDLRVVKLAIPINNPFGFYDFYPSRIKDQQSYFSGFSKNTLEATFNTHYEEIQRILLGYE DEQEDEEQRRGE QSHQDEGVIVRVSKEQIQELRKHAQSSSRKGKPPSES GPFNLRSDNEPI |
| Consensus | *:***.*****.:***** :*****.****:*****:*****: *****: ** : *::*: : ****:*:*****:*****:***** :*** :*****:.*                      |

|           |                                                                                                                                |
|-----------|--------------------------------------------------------------------------------------------------------------------------------|
| F5B8V9_β1 | YSNKFGNFYEITPDINPQFQDLNISLTFTEINEGALLLPHYNSKAIFIVVVDEGEKNYEL VGIRDQQRRQQDEQE EEEYEQGEEEVRRYSDKLSKGDVFII PAGHPLSINASSNLRLLLGFGI |
| F5B8W3_β7 | YSNKFGNFYEITPERNPQVQDLDISLTFTEINEGALLLPHYNSKAIFIVVVDEGEKNYEL VGIRDQQRRQQDEQEE----EEEEVRRYSARLSEGDI FVIPAGYPISVNASSNLRLLLGFGI   |
| F5B8W2_β4 | YSNKFGNFYEITPNRNPQAQDLDISLTFIEINEGALLLPHYNSKAIFVVLVDEGEKNYEL VGIRDQQRRQQDEQE-----VRRYSARLSEGDI FVIPAGHPISINASSNLRLLLGFGI       |
| F5B8W4_β6 | YSNKFGNFYEITPNRNPQAQDLDISLTFIEINEGALLLPHYNSKAIFVVLVDEGEKNYEL VGIRDQQRRQQDEQE-----VRRYSARLSEGDI FVIPAGHPISINASSNFRLLGFGI        |
| F5B8W1_β3 | YSNKFGNFYEITPDRNPQAQDLDISLTFIEINEGALLLPHYNSKAIFVVVVDEGEKNYEL VGIRDQQRRQQDEQE-----VRRYSARLSEGDI FVIPAGHPISINASSNLRLLLGFGI       |
| F5B8W2_β2 | YSNKFGNFYEITPDRNPQAQDLDISLTFIEINEGGLLLPHYNSKAIFVVVVDEGEKNYEL VGIRDQERQQDEQE Q-----EEVRRYNAKLSEGDI FVIPAGHPISINASSNLRLLLGFGI    |
| F5B8W5_β5 | YSNKFGNFYEITPDRNPQVQDLDISLFTEISEGALLLPHYNSKAIFVIVVDEGEKNYEL VGIRNQQRQQDEQEV-----EEVRSYNARLSEGDI LVIPAGHPLSINASSNLRLLLGFGI      |
| Consensus | *****:: *** **::*** * *.**.* *****:::***** *****: :***** ** *. :*:**::*****: *:*****:*****                                     |

|           |                                                                                         |
|-----------|-----------------------------------------------------------------------------------------|
| F5B8V9_β1 | NANENQRNFLAGSEDNVIKQLDREVKELTFPGSIEDVERLIKNQQQSYFANAQPQQQQQ-REKEGRRGRRGPISILNALY-----   |
| F5B8W3_β7 | NANENQRNFLAGSEDNVISQLDREVKELTFPGSAQDVERLIKNQQQSYFANAQPQQKQQ-REKEGRRGRRSLISSILSTLY-----  |
| F5B8W2_β4 | NADENQRNFLAGSEDNVIRQLDTEVKGLTFPGSTEDVERLIKNQQQSYFANAQPQQQQQ-REREGRRGRRGHISSILSTLY-----  |
| F5B8W4_β6 | NADENQRNFLAGFEDNVIRQLDREVKGLTFPGFAEDVERLIKNQQQSYFANAQPQQQQQ-REREGRHGRRGHIFSILSTLY-----  |
| F5B8W1_β3 | NADENQRNFLAGSEDNVIRQLDREVKGLTFPGSAEDVERLIKNQQQSYFANAQPQQQQQ-REREGRHGRRGHISSILSTLY-----  |
| F5B8W2_β2 | NADENQRNFLAGSEDNVIRQLDKEVKQLTFPGSVEDVERLIKNQQQSYFANAQPQQQQQ-REKEGRRGRRGLSFPRSLFTKLLSTIM |
| F5B8W5_β5 | NADENQRNFLAGSEDNVIRQLDREVKELTFPGSAEDVERLIRNQQQSYFANAQPQQQQQQREKEGRRGRRGPISILSALY-----   |
| Consensus | ** :***** ***** ** * * * * :*****:*****:*** ** : : :                                    |



C

F5B8W3\_β7  
F5B8W3\_tβ7  
F5B8W5\_β5  
F5B8W5\_tβ5  
Consensus

MARMRVRFPTLVLLLGILFLMAVSIGIAYGEKDVIKNHERPGEREHEERDPRQQPRPRKQEEQEREHRREEEHDRDPSRGRRESEERQEEERERRREPCREEREQEQQPQHGR----REEE  
-----  
MAKMRVRFPM LVLLLG VVFL LAVSIGIAYGEKDVIKNPERPEERQEEERDPRQP PPSRQQEEQEREHRREKERDREPSRGRSESKQSQEEERERRKEHDREREQEQQPQYGRRH EEEEEKG  
-----

F5B8W3\_β7  
F5B8W3\_tβ7  
F5B8W5\_β5  
F5B8W5\_tβ5  
Consensus

EEEEEWQPRRLRPQSRKEEREQE QGSSSSSRKQSGYERRQ-----YHERREQRDEKEKEQDSRSDSRRQRNPYHFSSERFQTRYRNRNGQIRVLER  
-----EQDSRSDSRRQRNPYHFSSERFQTRYRNRNGQIRVLER  
EEEEEGQARRQRPQRRREEREQE QGSSSESRRQSGDERRHRHEKREQREEREQE QGSSSGRQSDYGRRQRHEGREQREEREQE QGSSSESHRLRNPYYFSSERFQTRYKNKNGQIRVLER  
-----EQGSSSESHRLRNPYYFSSERFQTRYKNKNGQIRVLER  
\*\*\*.\* \*\*:\*: \* \*:\*:\*\*\*\*\*:\*:\*\*\*\*\*

F5B8W3\_β7  
F5B8W3\_tβ7  
F5B8W5\_β5  
F5B8W5\_tβ5  
Consensus

FDQRTNRLLENLQNYRIVEFQSNPNTLILPKHSDADYILVVLNGRATITIVNPDKRQAYNLEYGDALRVPAGTTSYILNPDDNQNLRVVKLAIPINNPSNFYDFYPSSTKDQQSYFSGFSK  
FDQRTNRLLENLQNYRIVEFQSNPNTLILPKHSDADYILVVLNGRATITIVNPDKRQAYNLEYGDALRVPAGTTSYILNPDDNQNLRVVKLAIPINNPSNFYDFYPSSTKDQQSYFSGFSK  
FDQRTNRLLENLQNYRIVEFQSRPNTLILPKHSDADYILVVLNGRATITIVNPDKRQAYNLEYGDALRLPAGTTSYILNPDDNQDLRVVKLAIPINNPGKFYDFYPSRTKDQQSYFSGFSK  
FDQRTNRLLENLQNYRIVEFQSRPNTLILPKHSDADYILVVLNGRATITIVNPDKRQAYNLEYGDALRLPAGTTSYILNPDDNQDLRVVKLAIPINNPGKFYDFYPSRTKDQQSYFSGFSK  
\*\*\*\*\*.\*\*\*\*\*:\*\*\*\*\*:\*\*\*\*\*:\*\*\*\*\*.\*\*\*\*\* \*\*\*\*\*

F5B8W3\_β7  
F5B8W3\_tβ7  
F5B8W5\_β5  
F5B8W5\_tβ5  
Consensus

NTLEATFNTRYEEIQRILLGNEDEQEDEEQRRGQE QSYQDEGVIVRVSKEQIQELRKHAQSSSRKGKPSESGPFNLRSNESIYSNKFGNFYEITPERNPQVQDLDISLTFTEINEGALLL  
NTLEATFNTRYEEIQRILLGNEDEQEDEEQRRGQE QSYQDEGVIVRVSKEQIQELRKHAQSSSRKGKPSESGPFNLRSNESIYSNKFGNFYEITPERNPQVQDLDISLTFTEINEGALLL  
NTLEATFNTHYEEIQRILLGYEDEQEDEEQRRQE QSHQDEGVIVRVSKEQIQELRKHAQSSSRKGKPSESGPFNLRSNAPIYSNKFGNFYEITPDRNPQVQDLDISLTFTEISEGALLL  
NTLEATFNTHYEEIQRILLGYEDEQEDEEQRRQE QSHQDEGVIVRVSKEQIQELRKHAQSSSRKGKPSESGPFNLRSNAPIYSNKFGNFYEITPDRNPQVQDLDISLTFTEISEGALLL  
\*\*\*\*\*:\*\*\*\*\* \*\*\*\*\* \*\*\*\*\*:\*\*\*\*\*.\*\*\*\*\*:\*\*\*\*\* \*\*\*\*\*.\*\*\*\*\*

F5B8W3\_β7  
F5B8W3\_tβ7  
F5B8W5\_β5  
F5B8W5\_tβ5  
Consensus

PHYNSKAIFIVVDEGEGNYELVGIRDQQRQQDEQE EEEEEVRRYSARLSEGDI FVIPAGYPISVNASSNLRLLGFGINANENQRNFLAGSEDNVISQLDREVKELTFPGSAQDVERLIK  
PHYNSKAIFIVVDEGEGNYELVGIRDQQRQQDEQE EEEEEVRRYSARLSEGDI FVIPAGYPISVNASSNLRLLGFGINANENQRNFLAGSEDNVISQLDREVKELTFPGSAQDVERLIK  
PHYNSKAIFIVVDEGEGNYELVGIRNQQRQQDEQE--VEEVRSYNARLSEGDI LVIPAGHPLSINASSNLRLLGFGINADENQRNFLAGSEDNVIRQLDREVKELIFPGSAEDVERLIR  
PHYNSKAIFIVVDEGEGNYELVGIRNQQRQQDEQE--VEEVRSYNARLSEGDI LVIPAGHPLSINASSNLRLLGFGINADENQRNFLAGSEDNVIRQLDREVKELIFPGSAEDVERLIR  
\*\*\*\*\*:\*\*\*\*\*:\*\*\*\*\* \*\*\*\*\* \*.\*\*\*\*\*\*:\*\*\*\*\*:\*:\*\*\*\*\*:\*\*\*\*\* \*\*\*\*\* \*\*\*\*\*:\*\*\*\*\*:

F5B8W3\_β7  
F5B8W3\_tβ7  
F5B8W5\_β5  
F5B8W5\_tβ5  
Consensus

NQQQSYFANAQPQQKQQ-REKEGRRGRRSLISSILSTLY  
NQQQSYFANAQPQQKQQ-REKEGRRGRRSLISSILSTLY  
NQQQSYFANAQPQQQQQQREKEGRRGRRGPISILSALY  
NQQQSYFANAQPQQQQQQREKEGRRGRRGPISILSALY  
\*\*\*\*\*:\*\*\* \*\*\*\*\*. \*\*\*\*\*:\*\*\*

D

F5B8W5\_β5  
F5B8W3\_β7  
Consensus

MAKMRVRFPM LVLLLG VVFL LAVSIGIAYGEKDVIKNPERPEERQEEERDPRQP PPSRQQEEQEREHRREKERDREPSRGRSESKQSQEEERERRKEHDREREQEQQPQYGRRH EEEEEKG  
MARMRVRFPTLVLLLGILFLMAVSIGIAYGEKDVIKNHERPGEREHEERDPRQQPRPRKQEEQEREHRREEEHDRDPSRGRRESEERQEEERERRREPCREEREQEQQPQHGR EEEEE--  
\*:\*\*\*\*\* \*\*\*\*\*:\*:\*\*\*\*\* \*\*\*\*\* \*\*.\*\*\*\*\*\* \*\*.\*:\*\*\*\*\*:\*:\*\*\*\*\* \*:\*: \*\*\*\*\*:\*\*\*\*\* \*\*\*\*\*:\*\*\*.\*\*\*\*

F5B8W5\_β5  
F5B8W3\_β7  
Consensus

EEEEEGQARRQRPQRRREEREQE QGSSSESRRQSGDERRHRHEKREQREEREQ  
--EEEWQPRRLRPQSRKEEREQE QGSSSSSRKQSGYERRQYHERREQRDEKEK  
\*\*\* \*.\* \*\* \* \*:\*\*\*\*\*.\*\*\*:\*\*\* \*\*: \*:\*\*\*\*\*:\*\*\*:
