# Supplementary material for: β-Conglutins’ Unique Mobile Arm Is a Key Structural Domain Involved in Molecular Nutraceutical Properties of Narrow-Leafed Lupin (Lupinus angustifolius L.)
Source: MDPI journal article supplement (doi:10.3390/ijms24087676), 2023-04-21
Supplement: s1 [file s1]

**Table S2. Viability (%) assessment of human peripheral blood mononuclear cells (PBMC).**

Viability was measured by MTT assay for isolated PBMC culture, congenitins  $\beta 5$  or  $\beta 7$ , LPS, LPS +  $\beta 5$  or  $\beta 7$ , LPS + t  $\beta 5$  or t $\beta 7$  during 24 hours.

Treatments including congenitin  $\beta 5$  or  $\beta 7$  (normal or truncated forms) were added at 10  $\mu\text{g}$ , and LPS at 1  $\mu\text{g}$ . Data represent mean  $\pm$  SD from three independent experiments.

| Samples                     | Viability       |                  |
|-----------------------------|-----------------|------------------|
|                             | T2D patients    | Healthy subjects |
| LPS                         | 97.5 $\pm$ 3.5  | 98.3 $\pm$ 2.0   |
| Conglutin $\beta 5$         | 102.5 $\pm$ 2.3 | 100.5 $\pm$ 1.5  |
| Conglutin t $\beta 5$       | 105.0 $\pm$ 4.4 | 102.0 $\pm$ 3.3  |
| Conglutin $\beta 7$         | 99.0 $\pm$ 2.2  | 98.0 $\pm$ 2.2   |
| Conglutin t $\beta 7$       | 98.9 $\pm$ 2.5  | 98.4 $\pm$ 2.0   |
| Conglutin $\beta 5$ + LPS   | 98.3 $\pm$ 2.1  | 97.8 $\pm$ 1.8   |
| Conglutin t $\beta 5$ + LPS | 97.4 $\pm$ 3.5  | 99.2 $\pm$ 1.5   |
| Conglutin $\beta 7$ + LPS   | 96.5 $\pm$ 5.6  | 101.5 $\pm$ 4.3  |
| Conglutin t $\beta 7$ + LPS | 101.3 $\pm$ 2.4 | 100.7 $\pm$ 1.4  |
