# Supplementary material for: β-Conglutins’ Unique Mobile Arm Is a Key Structural Domain Involved in Molecular Nutraceutical Properties of Narrow-Leafed Lupin (Lupinus angustifolius L.)
Source: MDPI journal article supplement (doi:10.3390/ijms24087676), 2023-04-21
Supplement: s1 [file s1]

## SUPPLEMENTARY FIGURE CAPTIONS

### Figure S1. $\beta 5$ and $\beta 7$ conglutins structural analysis.

Three-dimensional structure of  $\beta 5$  and  $\beta 7$  conglutins (Uniprot accession number F5B8W3 and F5B8W5, respectively) showing the mobile arm and globular domains. The structures are depicted as a cartoon diagram integrated by  $\alpha$ -helices,  $\beta$ -sheets, and coils (red, yellow, and green, respectively). Three-dimensional structure of (A) t $\beta 5$ , (C) t $\beta 7$ , (B)  $\beta 5$ , and (D)  $\beta 7$  conglutins depicted in (B, D) cartoon and (C, E) surface.

### Figure S2. $\beta$ -conglutinin protein sequences analysis.

Alignment of the complete NLL conglutinin protein sequences  $\beta 1$  to  $\beta 7$  (A); Alignment of the globular domain of the NLL conglutinin protein sequences  $\beta 1$  to  $\beta 7$  (B); Comparative alignment of the NLL conglutinin protein sequences  $\beta 5$ ,  $\beta 7$ , t $\beta 5$ , and t $\beta 7$  (C); Comparative alignment of the mobile-arm domain of the NLL conglutinin protein sequences t $\beta 5$  and t $\beta 7$  (D).
