# Supplementary material for: β-Conglutins’ Unique Mobile Arm Is a Key Structural Domain Involved in Molecular Nutraceutical Properties of Narrow-Leafed Lupin (Lupinus angustifolius L.)
Source: MDPI journal article supplement (doi:10.3390/ijms24087676), 2023-04-21
Supplement: s1 [file s1]

**Table S1. Viability (%) assessment of HEPG2 cell culture.**

Viability was measured by MTT assay for HEPG2 cell culture, conglutins  $\beta 5$  or  $\beta 7$ , LPS, LPS +  $\beta 5$  or  $\beta 7$ , LPS + t  $\beta 5$  or t $\beta 7$ .

Treatments including conglutinin  $\beta 5$  or  $\beta 7$  (normal or truncated forms) were added at 10  $\mu\text{g}$ , and LPS at 1  $\mu\text{g}$ . Data represent mean  $\pm$  SD from three independent experiments.

| Samples                     | Viability       |
|-----------------------------|-----------------|
| LPS                         | $99.0 \pm 1.5$  |
| Conglutin $\beta 5$         | $98.4 \pm 3.7$  |
| Conglutin t $\beta 5$       | $97.0 \pm 5.3$  |
| Conglutin $\beta 7$         | $99.0 \pm 2.6$  |
| Conglutin t $\beta 7$       | $100.0 \pm 4.3$ |
| Conglutin $\beta 5$ + LPS   | $95.4 \pm 4.7$  |
| Conglutin t $\beta 5$ + LPS | $97.2 \pm 5.5$  |
| Conglutin $\beta 7$ + LPS   | $101.4 \pm 3.6$ |
| Conglutin t $\beta 7$ + LPS | $102.6 \pm 5.2$ |
