# Supplementary material for: β-Conglutins’ Unique Mobile Arm Is a Key Structural Domain Involved in Molecular Nutraceutical Properties of Narrow-Leafed Lupin (Lupinus angustifolius L.)
Source: Int J Mol Sci. 2023 Apr 21;24(8):7676. doi: 10.3390/ijms24087676 (PMC10143110; doi:10.3390/ijms24087676)
Supplement: Supplementary file 1 [file ijms-24-07676-s001.zip]

Archive with 5 entries (5 files):
- Figure S1.pdf
- Table S2.pdf
- Figure-S2.pdf
- Table S1.pdf
- Supplementary Figure Captions.pdf
