# Supplementary figures and images for: β-Conglutins’ Unique Mobile Arm Is a Key Structural Domain Involved in Molecular Nutraceutical Properties of Narrow-Leafed Lupin (Lupinus angustifolius L.)
Source: MDPI journal article supplement (doi:10.3390/ijms24087676), 2023-04-21

**A**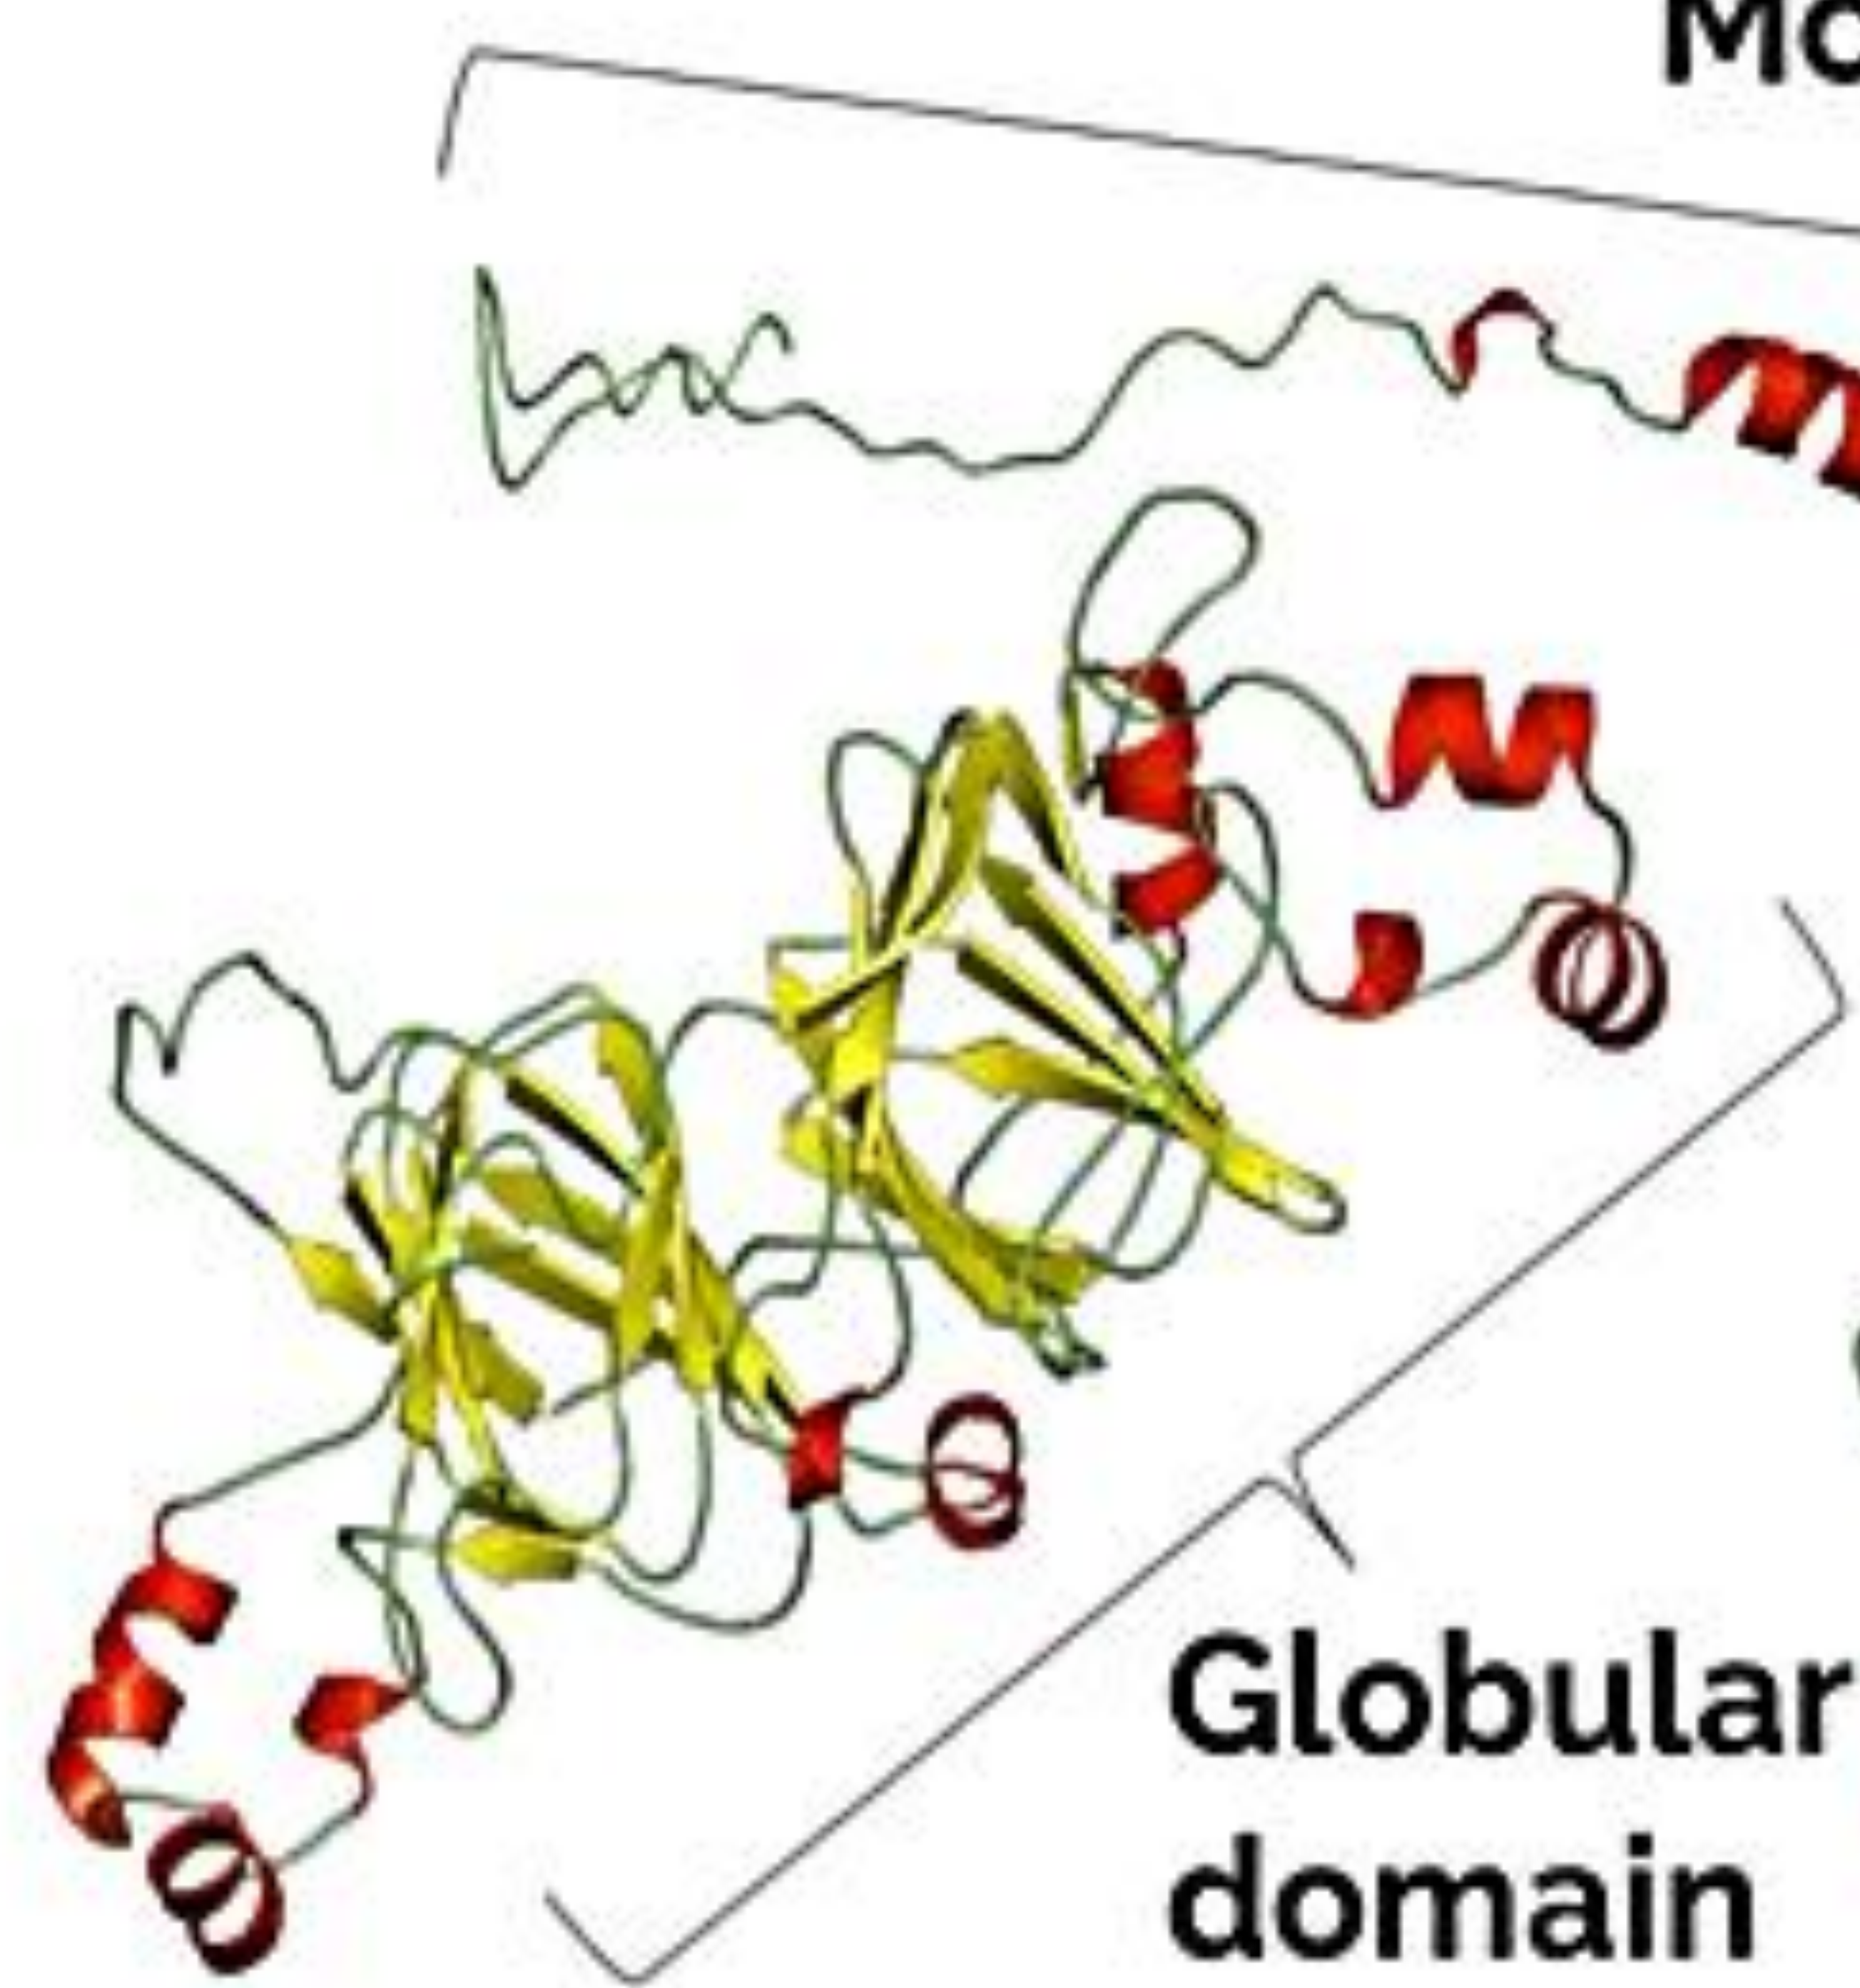**B****Mobile arm**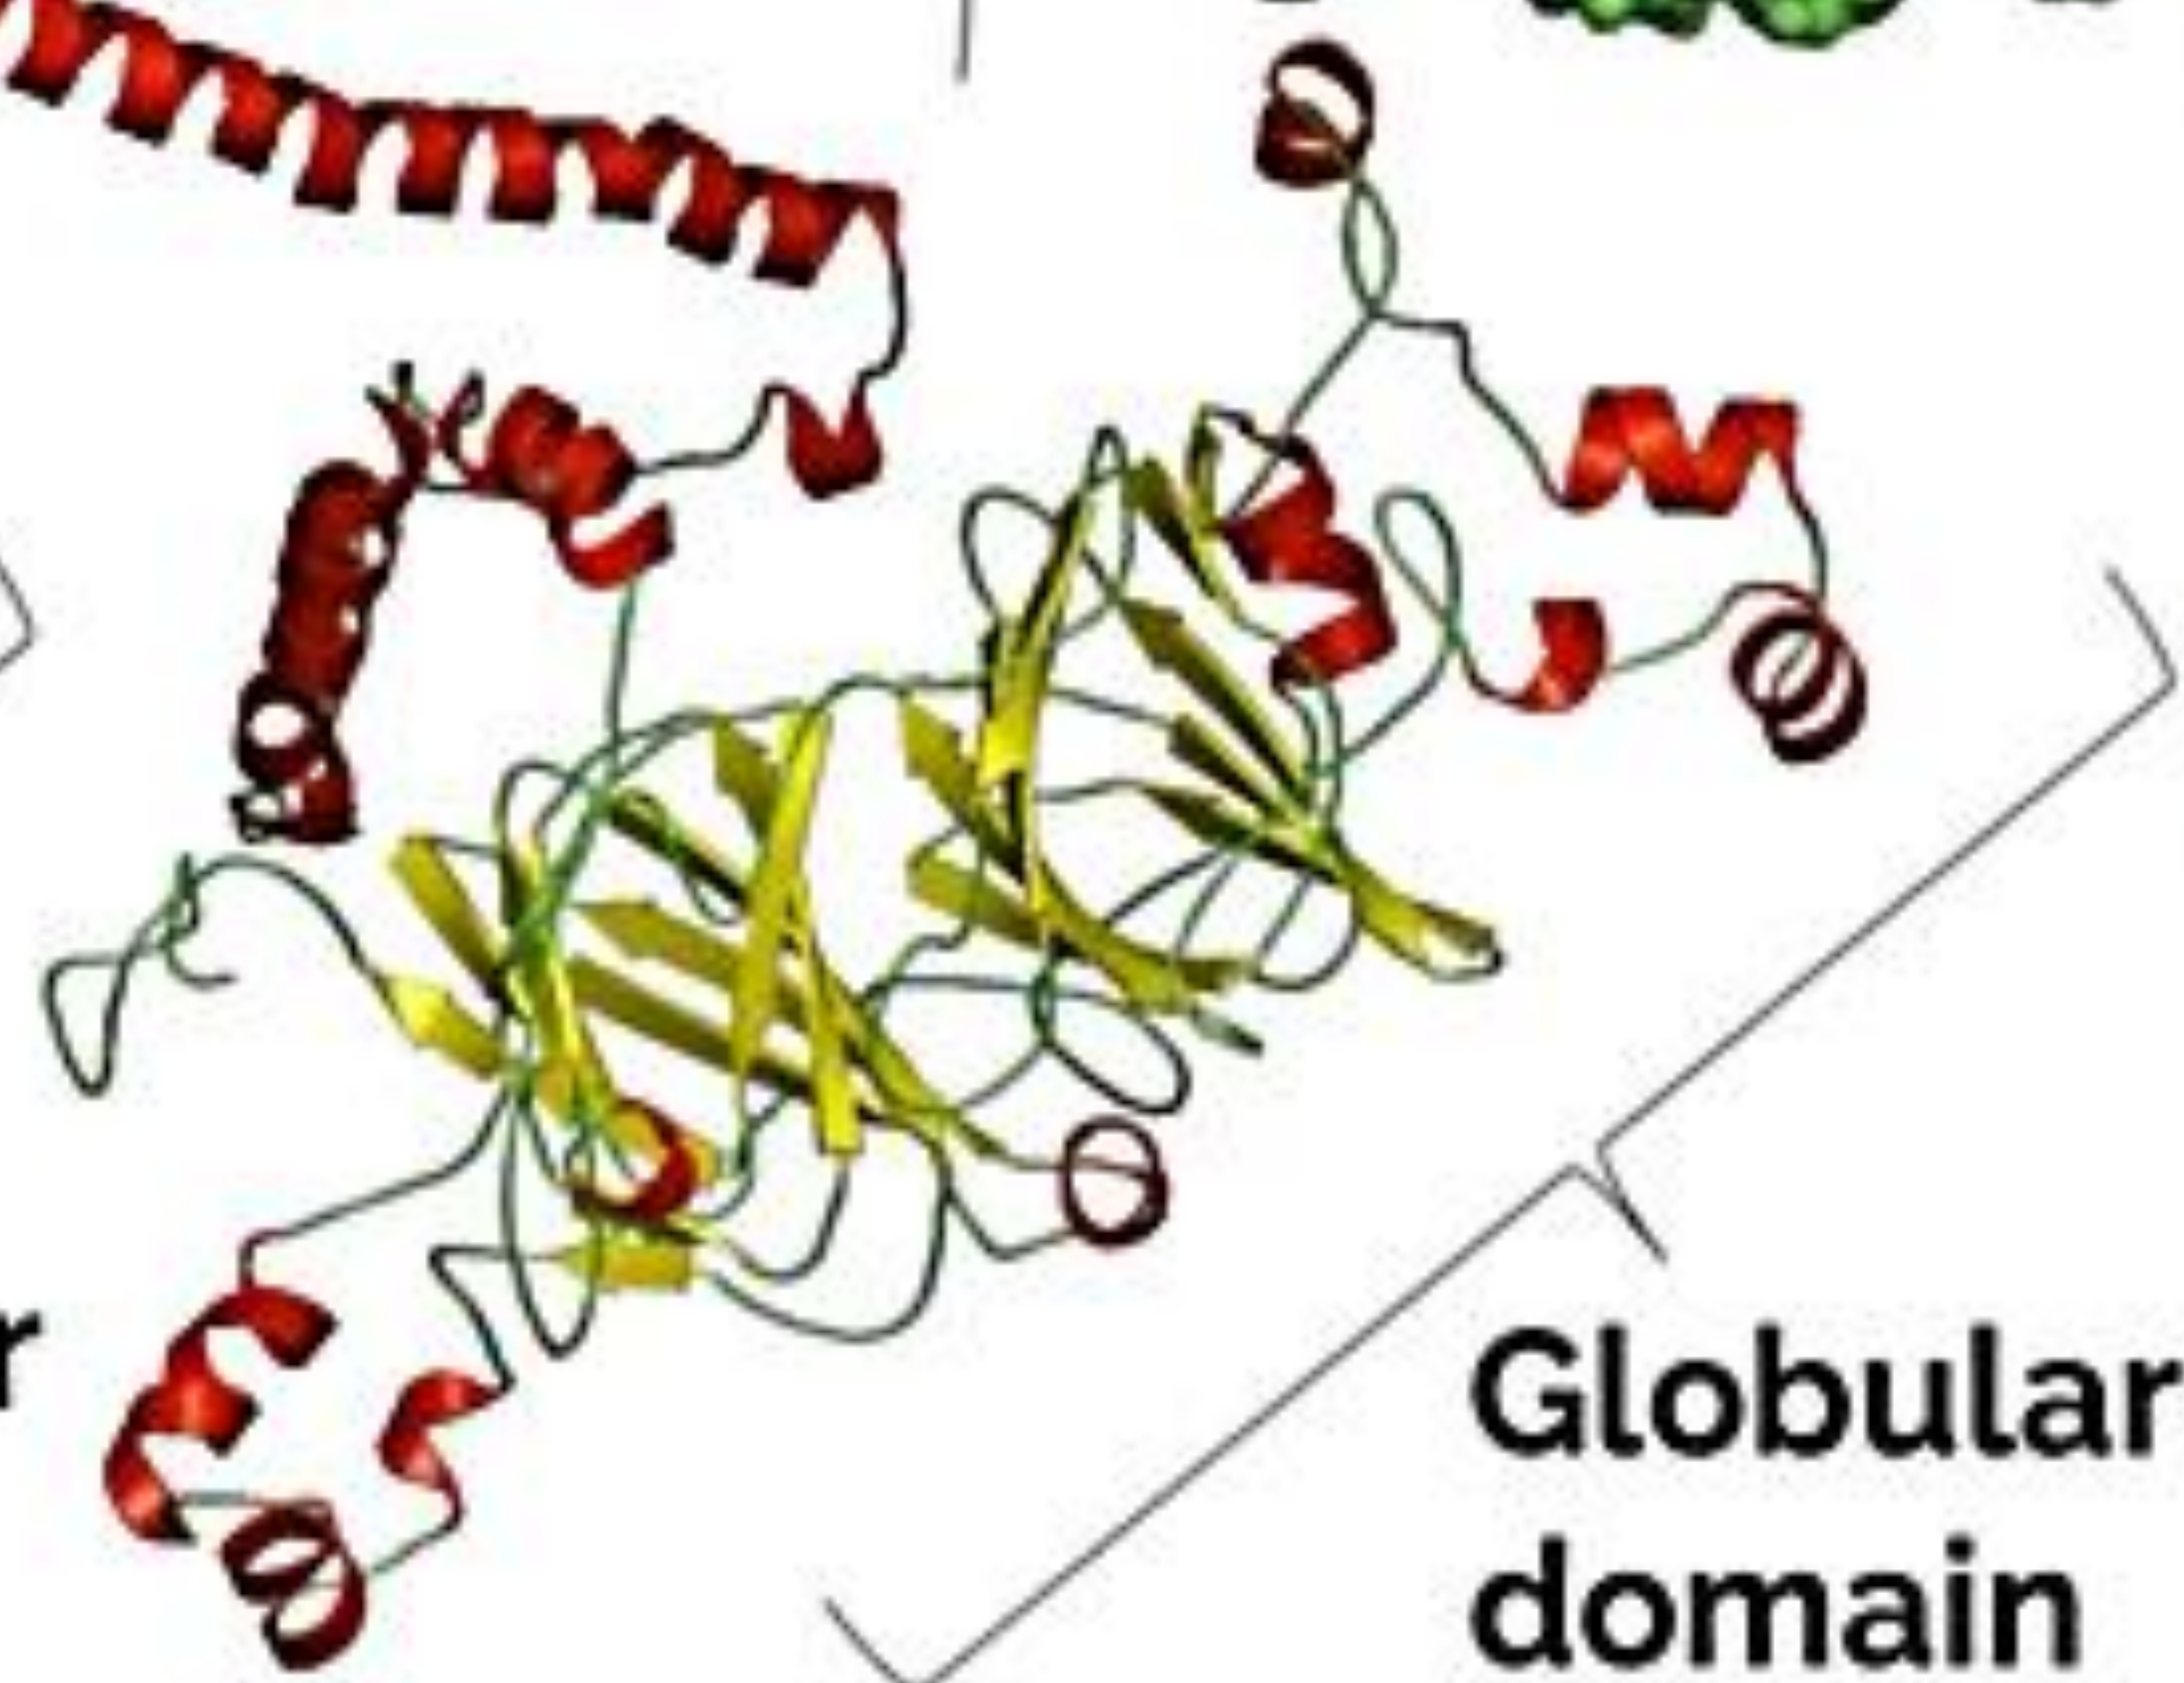**C****Mobile arm**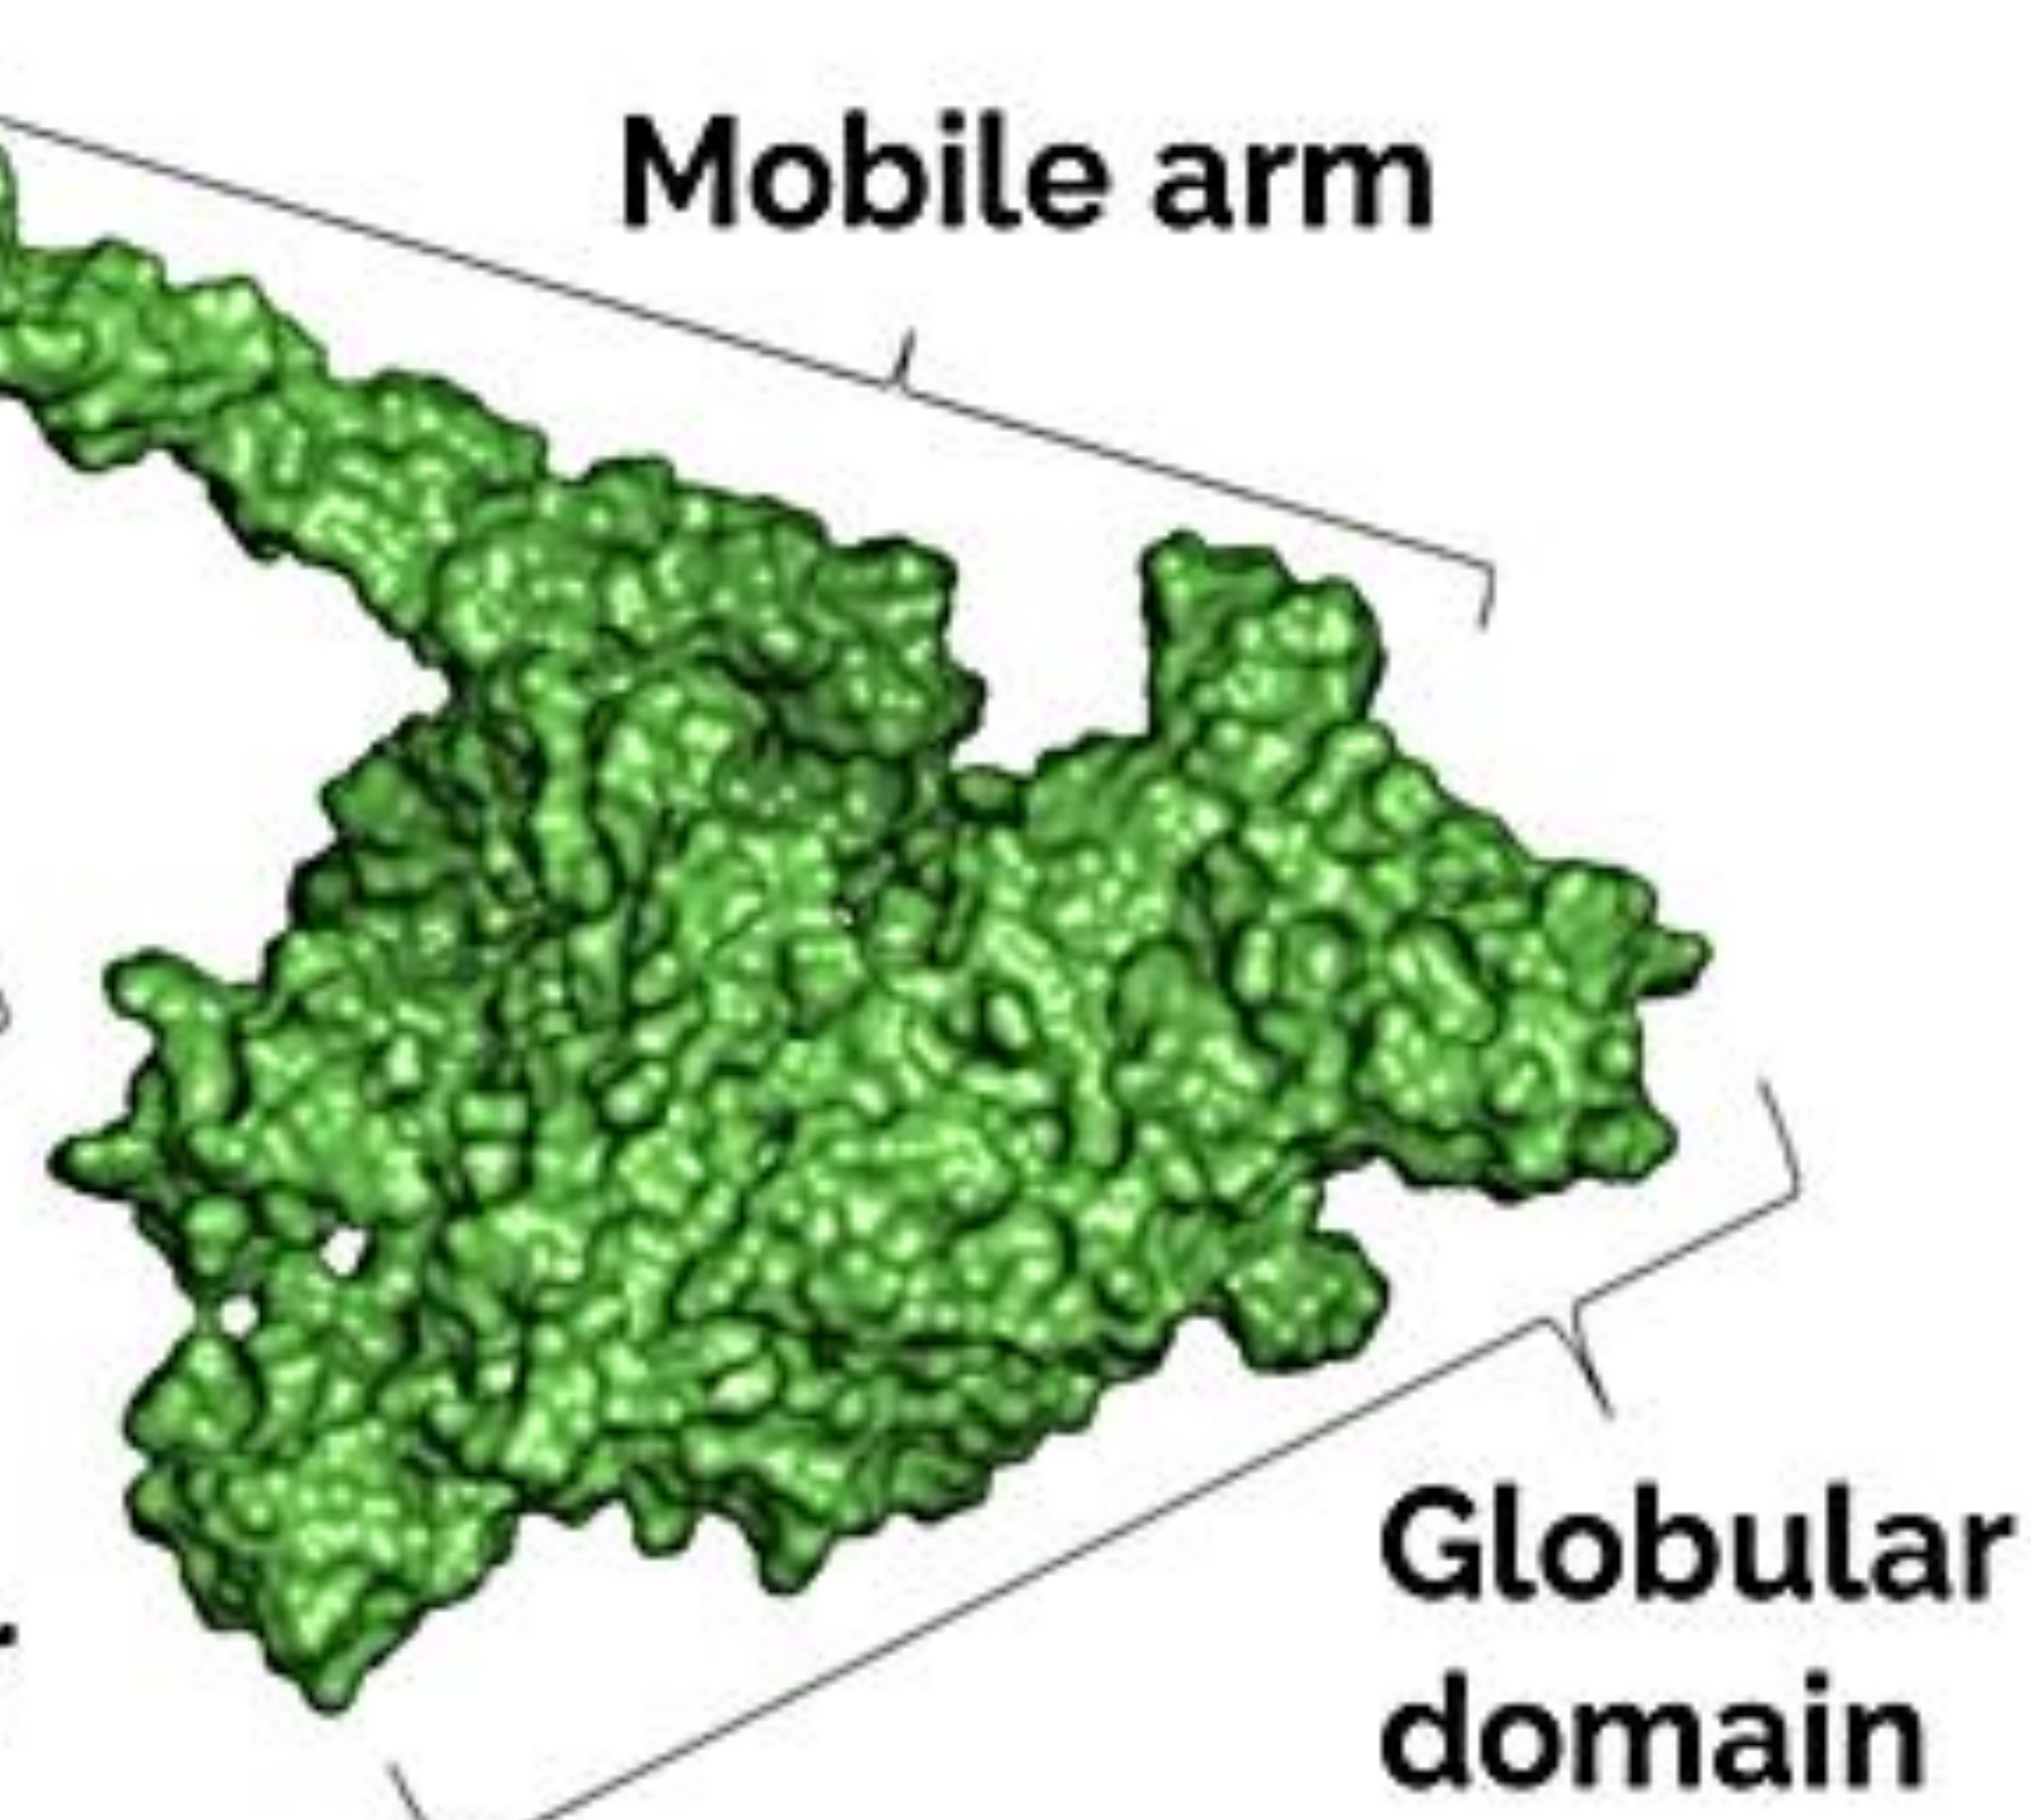**C**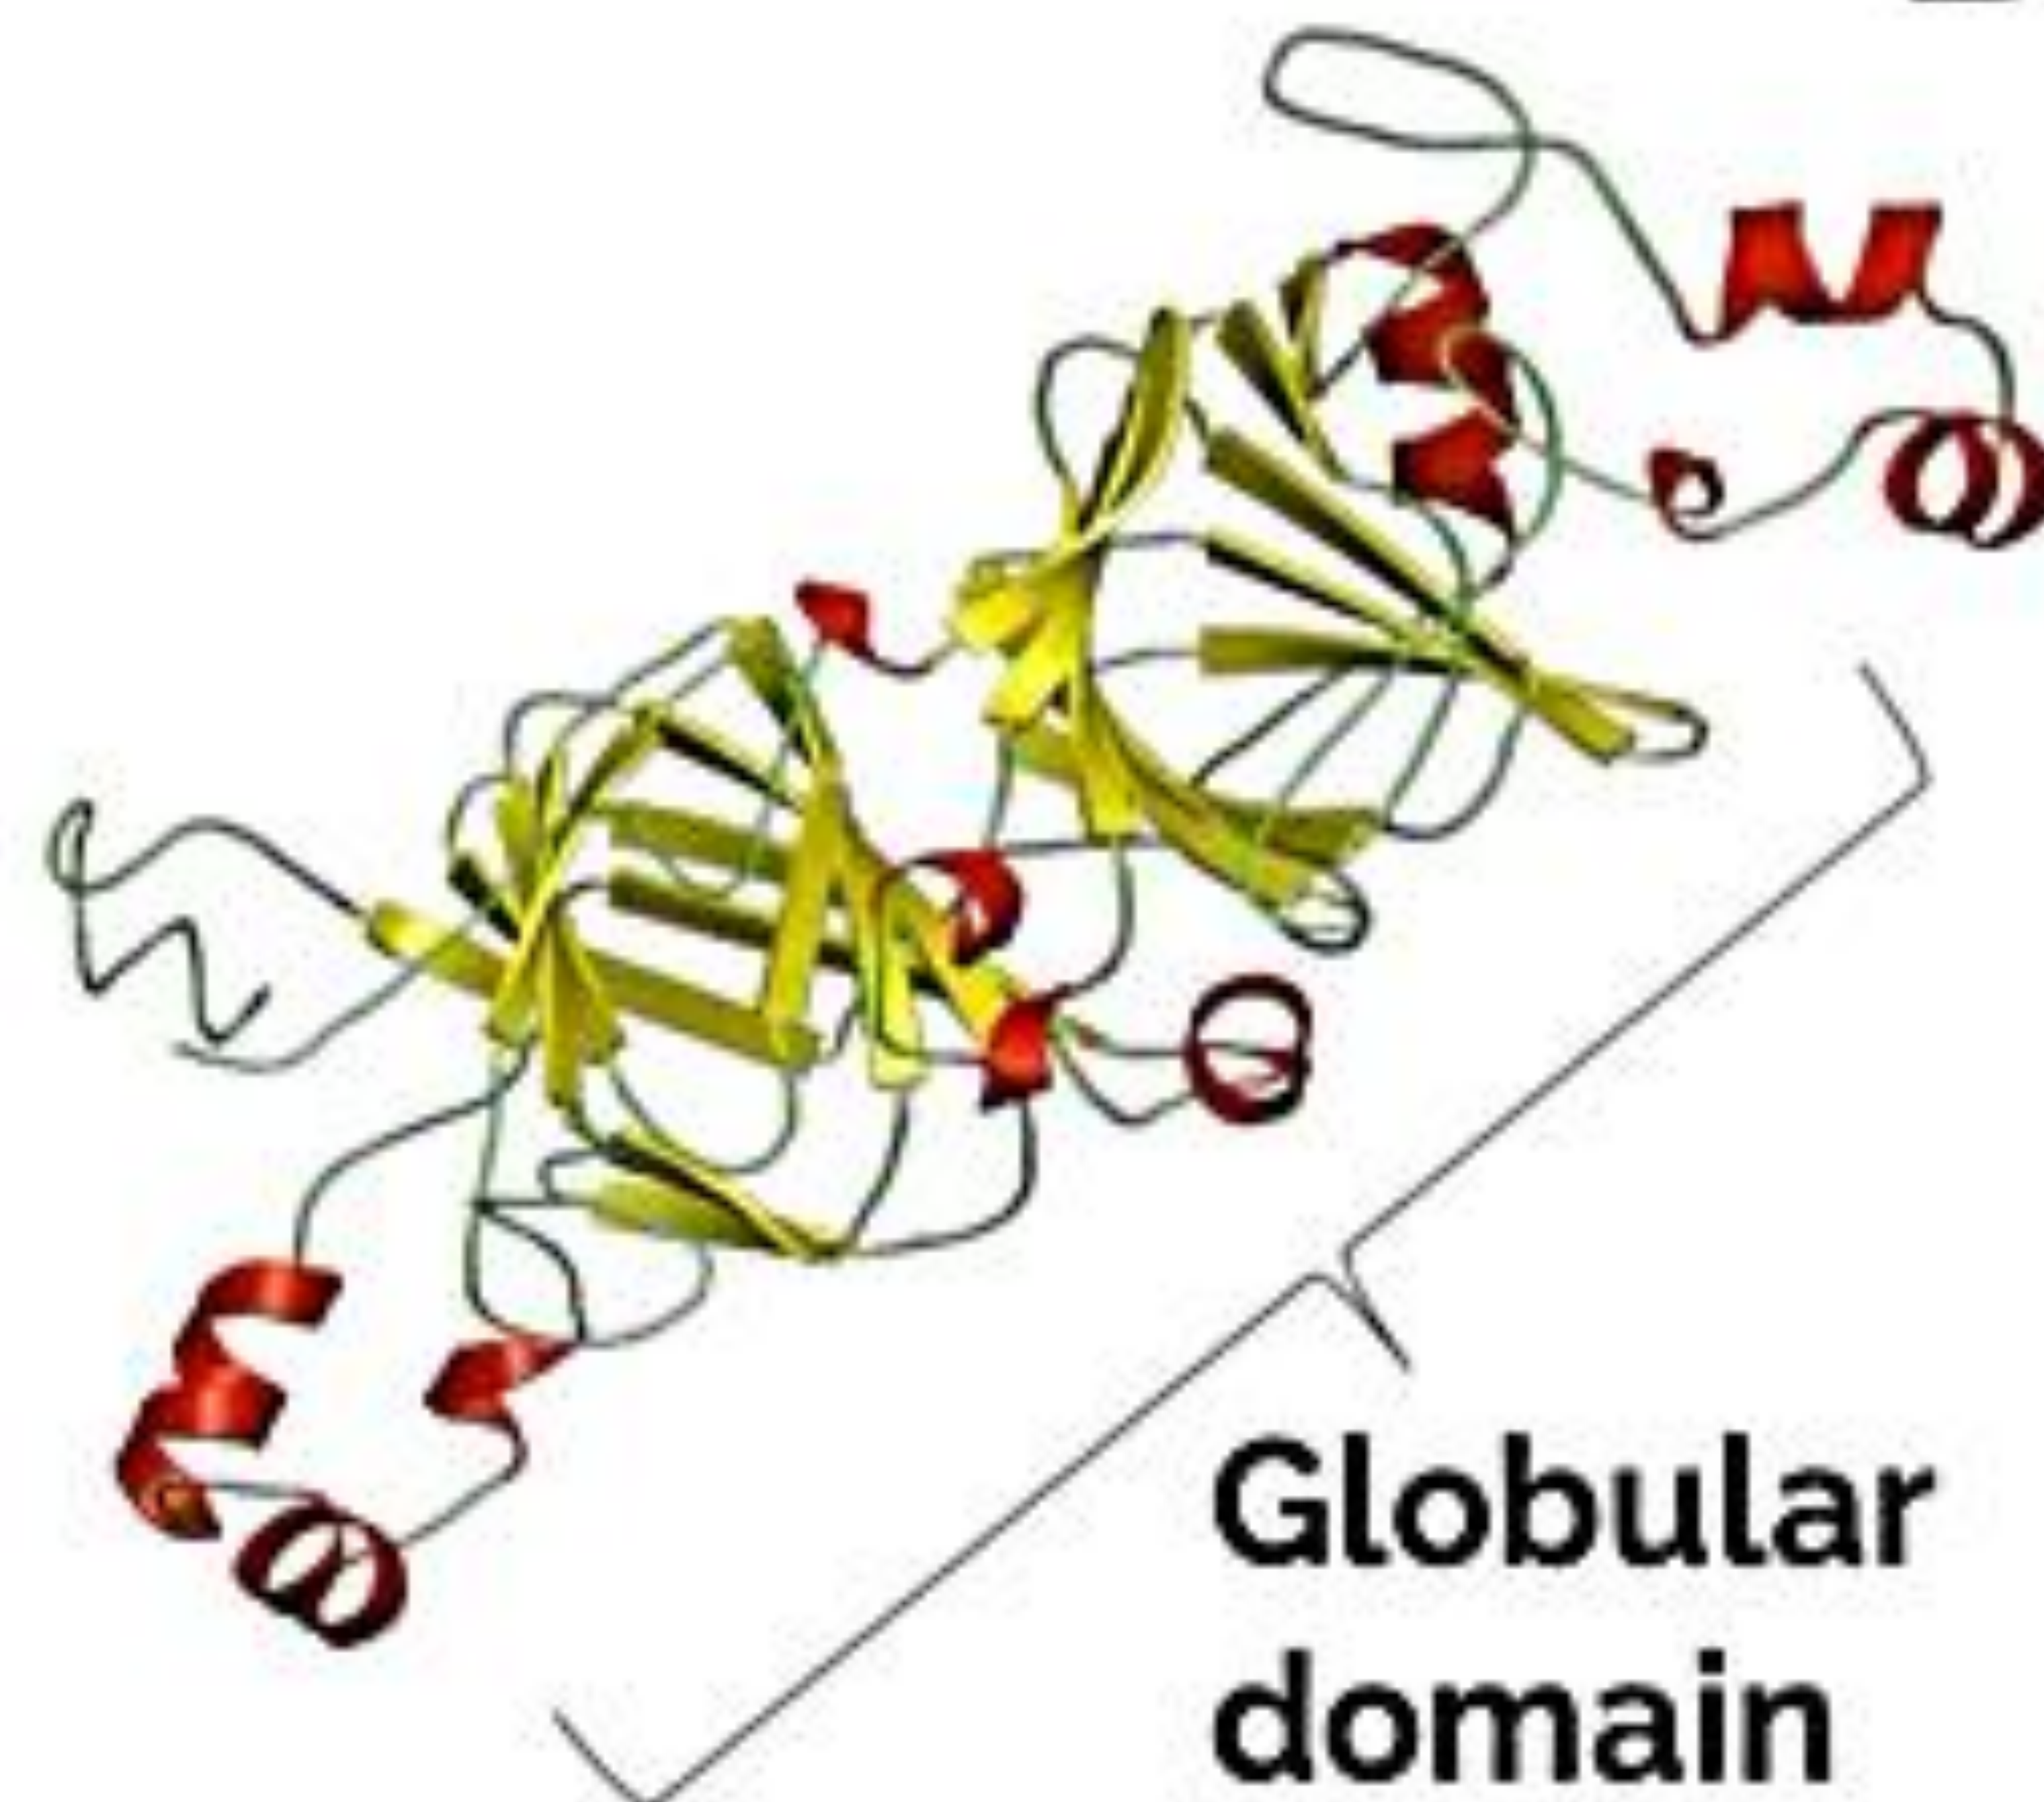**D****Mobile arm**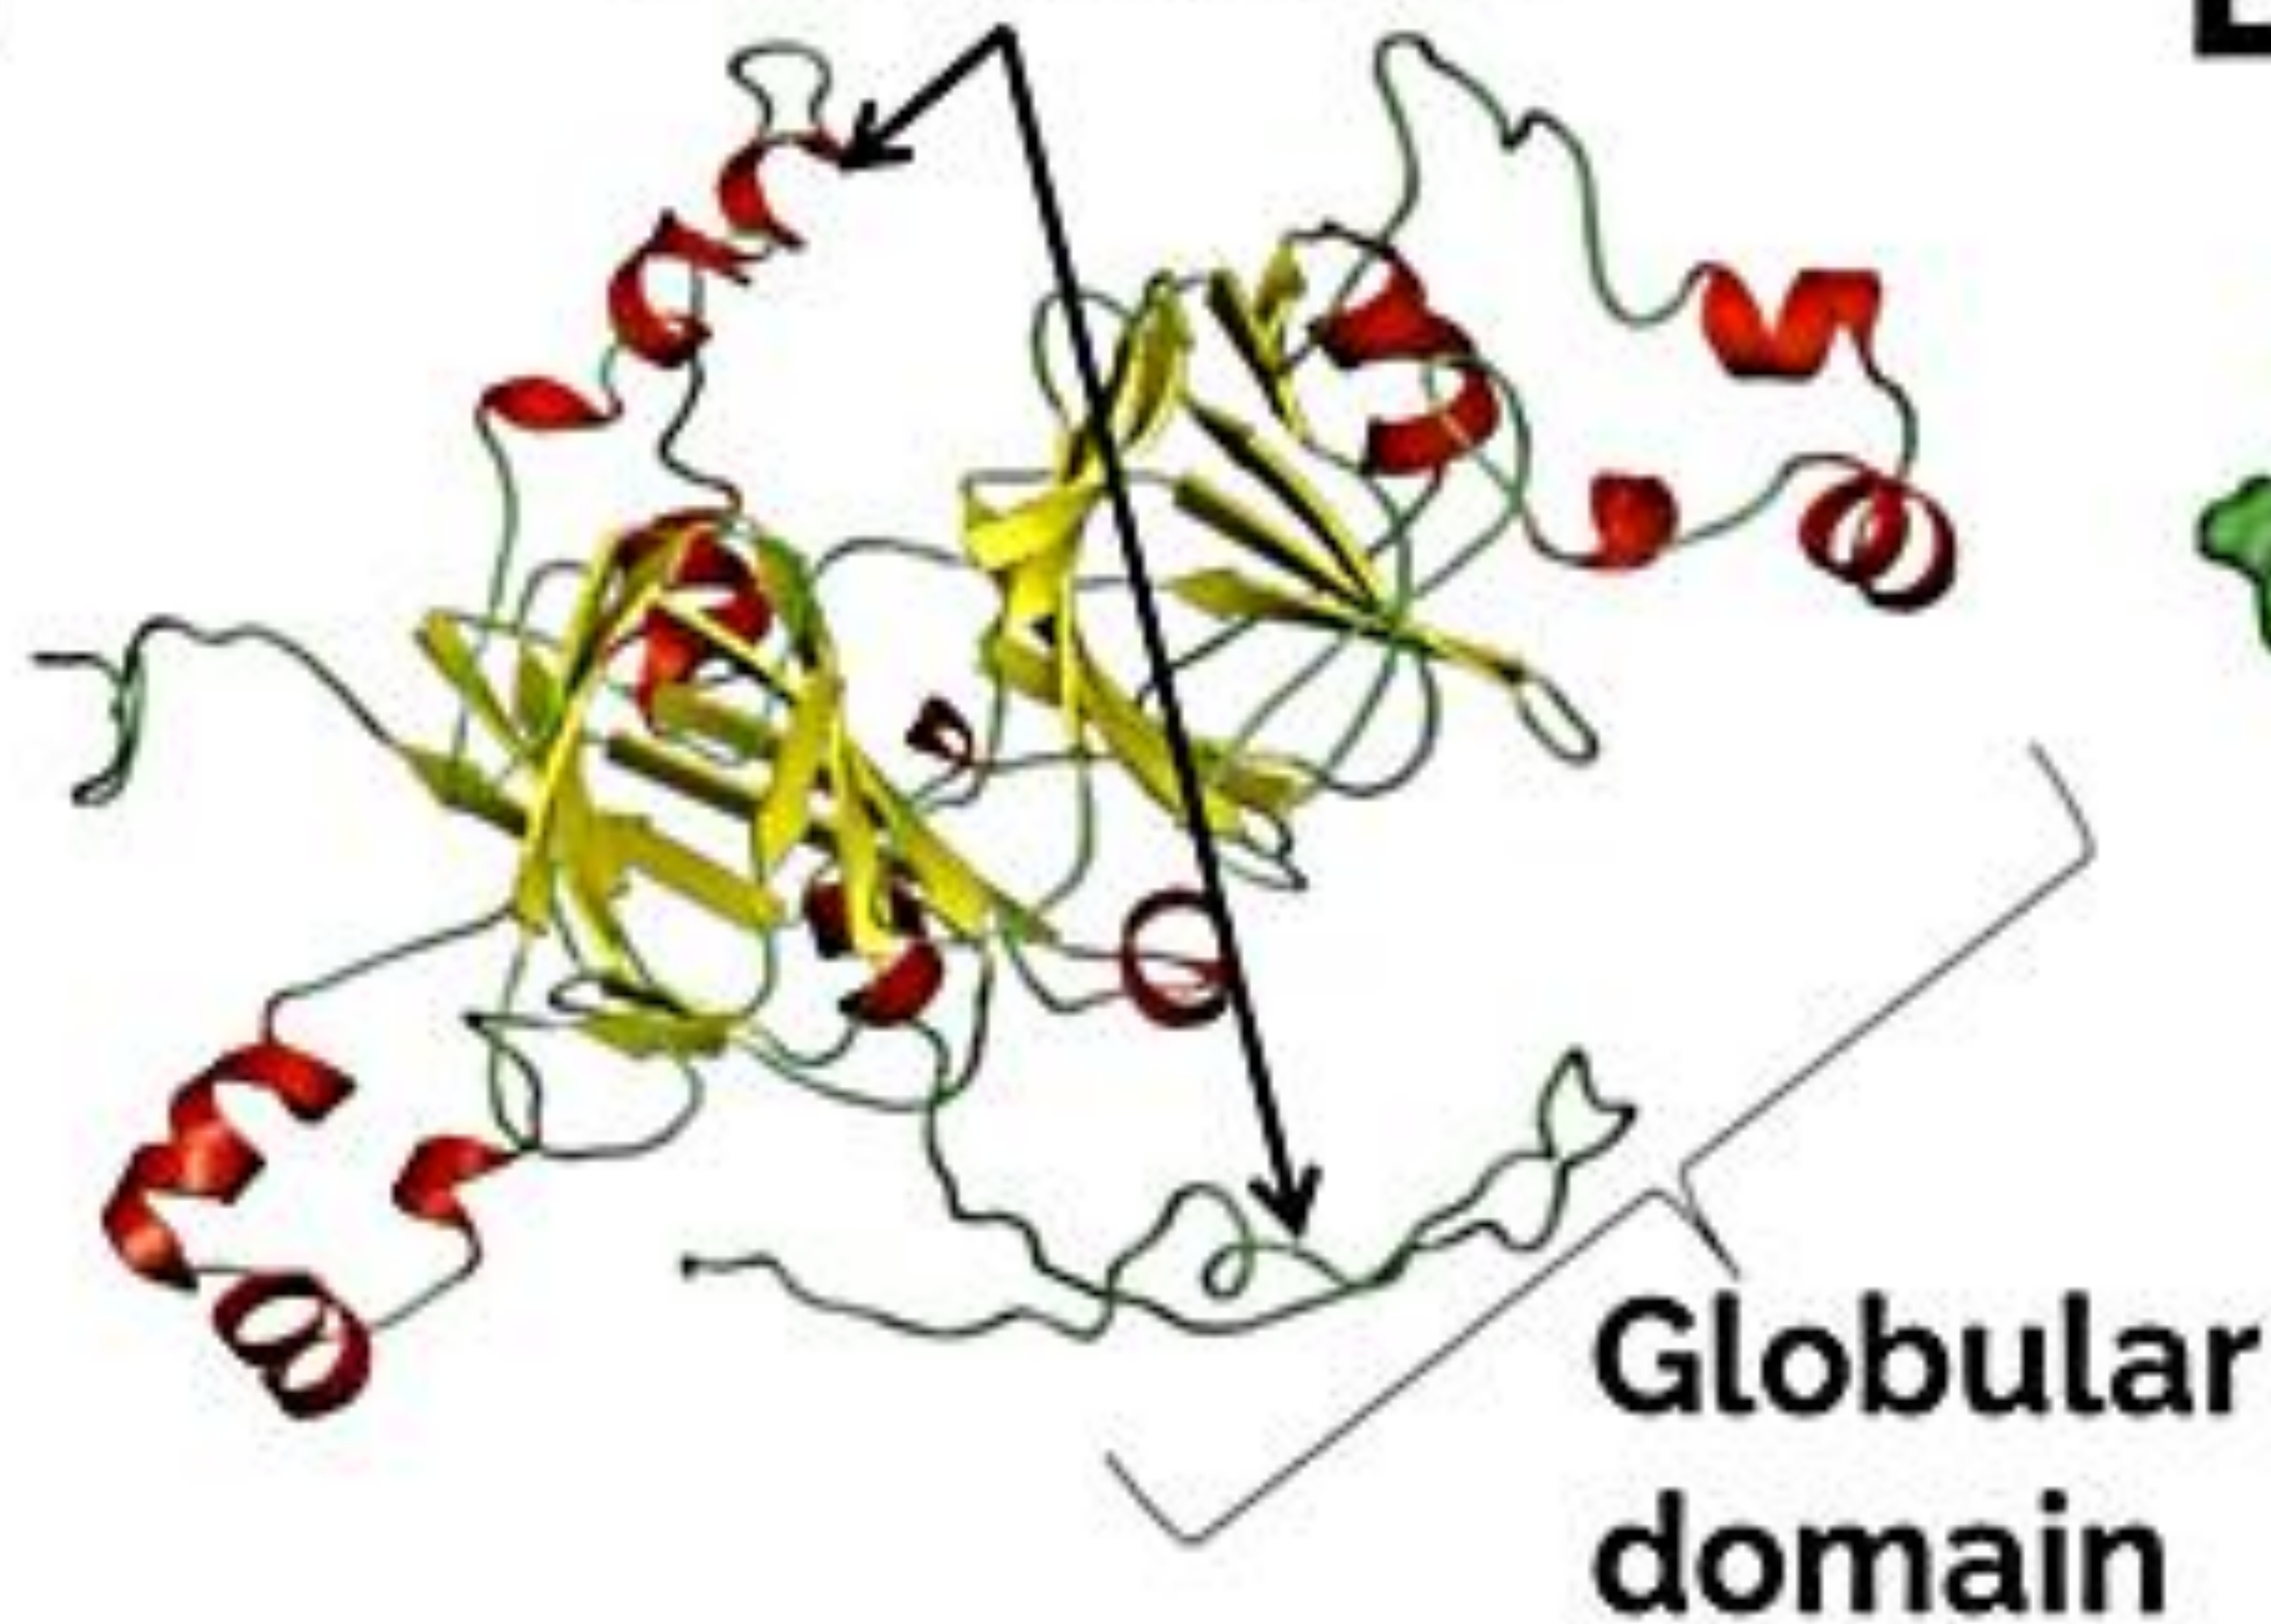**E****Mobile arm**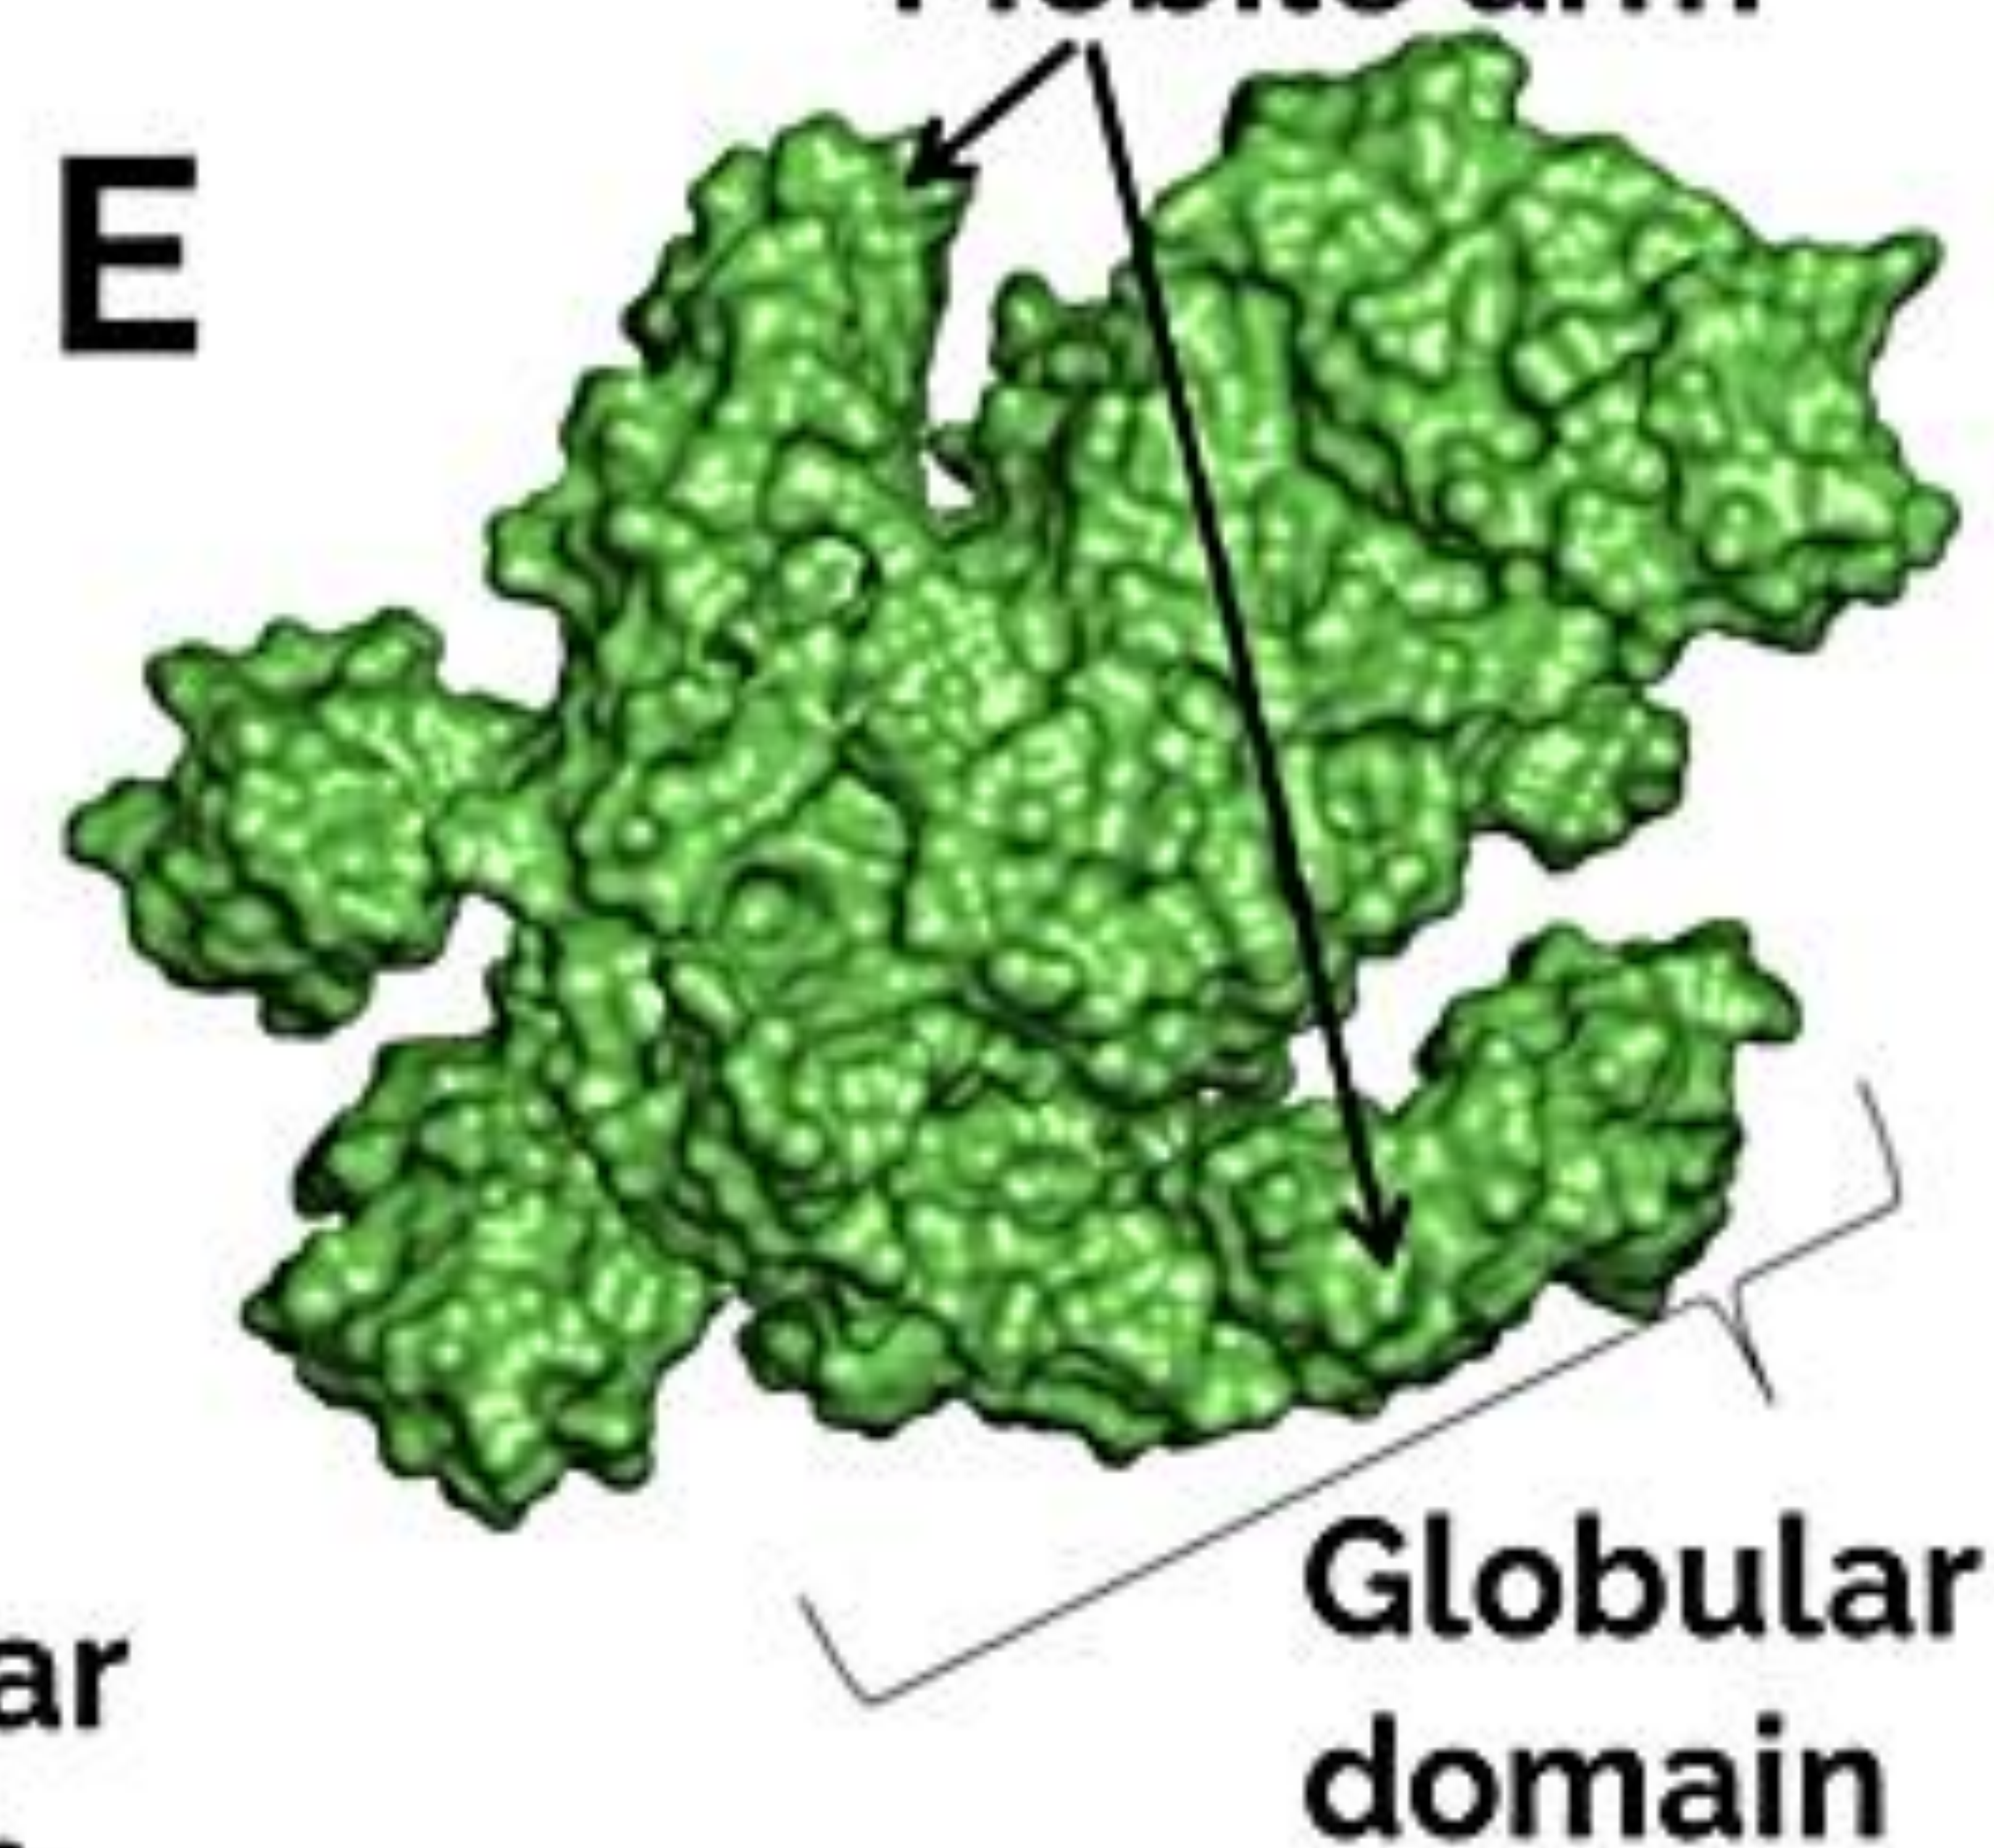

Supplement: s1 [file s1]
